# Supplementary material for: A pH and voltage dual-adjustment of electrochromic material achieves multicolor change based on alizarin red and Dawson-type polyoxometalate
Source: Royal Society of Chemistry journal article supplement (doi:10.1039/d3nj04274j), 2023-01-01
Supplement: d3nj04274j1.pdf [file d3nj04274j1.pdf]

Supplementary information

**A pH and voltage dual-adjustment electrochromic material achieves multicolor change based on alizarin red and Dawson-type polyoxometalate**

Jie Zhang,<sup>a</sup> Yan-Yan Yang,<sup>\*a</sup> Shu-Ping Liu,<sup>b</sup> Su-Yang Feng,<sup>a</sup> Feng-Ru Li,<sup>a</sup> Fang-Ting Chen,<sup>a</sup> Xiao-Yang Yu<sup>a</sup> and Xiao-Shu Qu,<sup>\*a</sup>

<sup>a</sup> *College of Chemical and Pharmaceutical Engineering, Jilin Institute of Chemical Technology, Jilin City, 132022, P. R. China.*

<sup>b</sup> *College of Tourism and Cuisine, Harbin University of Commerce, Harbin City, 150028, P. R. China.*

\*Corresponding author. E-mail: yangyanyan@jlct.edu.cn.

## Table of Contents

|           |   |
|-----------|---|
| Figure S1 | 3 |
| Figure S2 | 3 |
| Figure S3 | 4 |
| Figure S4 | 4 |
| Figure S5 | 5 |
| Figure S6 | 5 |
| Figure S7 | 5 |

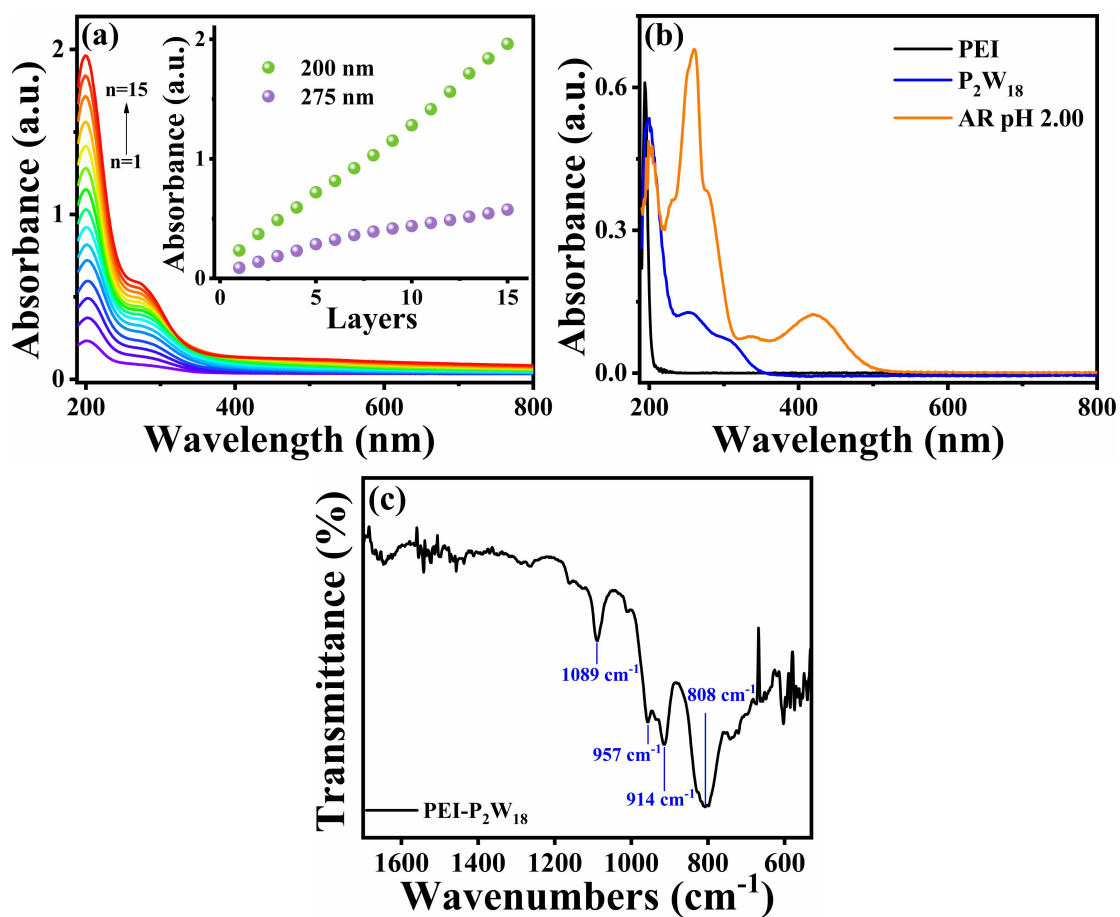

Figure.S1 (a) UV-vis absorption spectra on a quartz substrate of the PEI- $P_2W_{18}$  film (number of cycles: 0–15), Inset: Plots of the absorbance values at 200 and 275 nm. (b) UV-Vis absorption spectra of PEI,  $P_2W_{18}$  and AR. (c) IR spectra of PEI- $P_2W_{18}$  film.

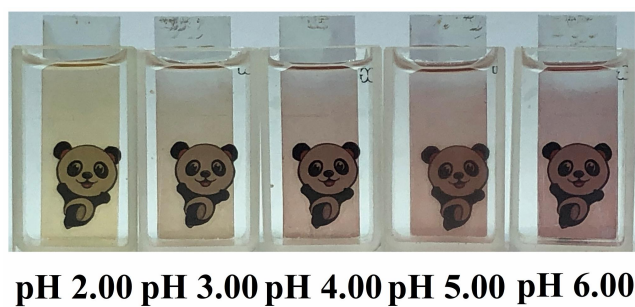

Figure.S2 Images for color of the  $P_2W_{18}$ -AR film in different pH value solutions.

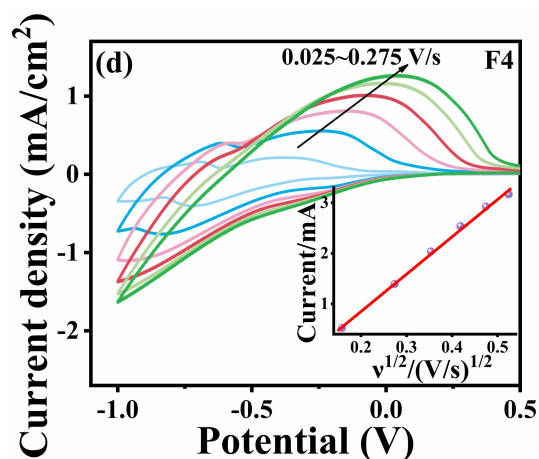

Figure.S3 Cyclic voltammetry curves of F4 at different scan rates (from inner to outer): 0.025, 0.075, 0.125, 0.175, 0.225, 0.275 V/s. Inset: the peak current density as a function of the square root of the scan rates.

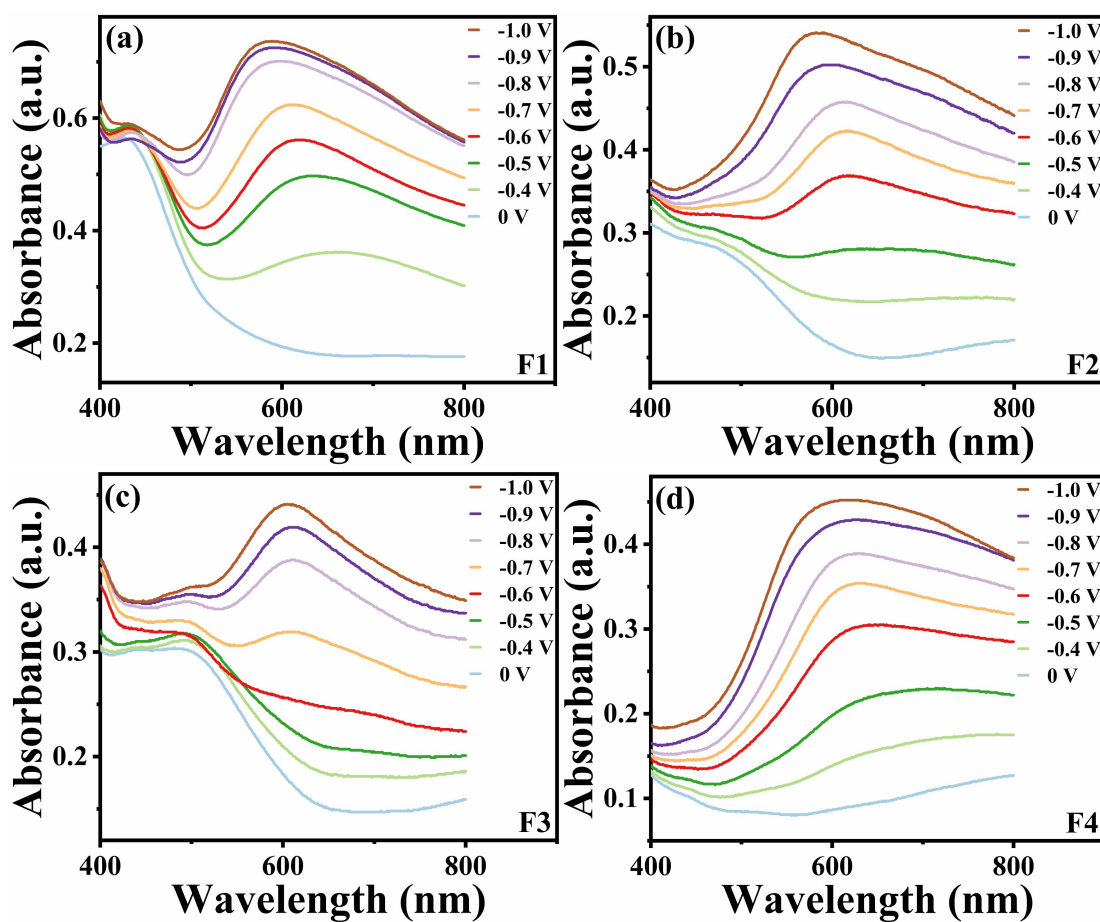

Figure.S4 UV-vis absorption spectra of F1-F4 films during the different applied potentials.

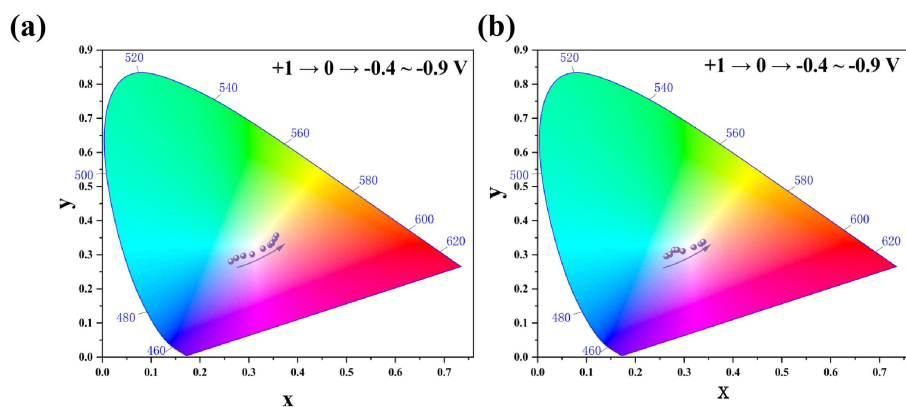

Figure.S5 CIE 1931 xy chromaticity space diagrams of (a) F2 and (b) F3.

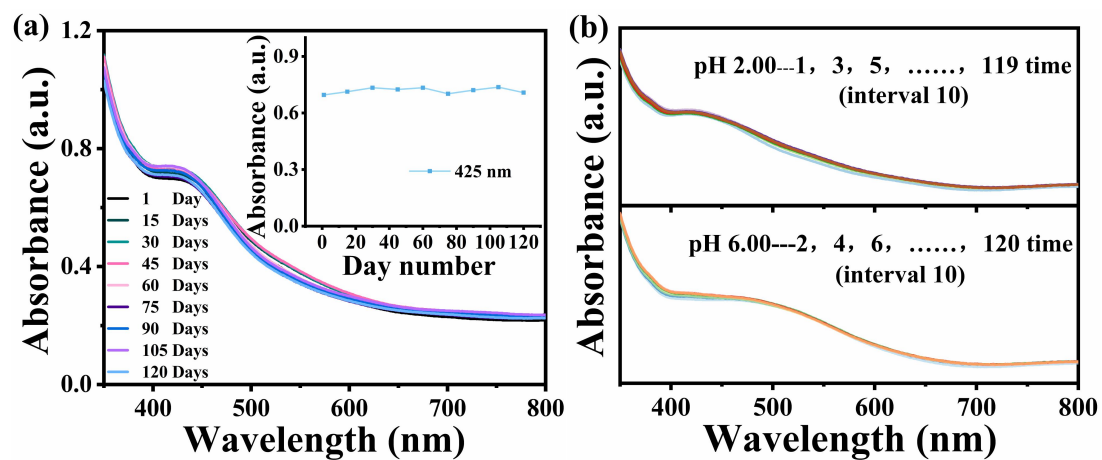

Figure.S6 (a) The time stability and (b) cycle stability in two solutions of the  $P_2W_{18}$ -AR film.

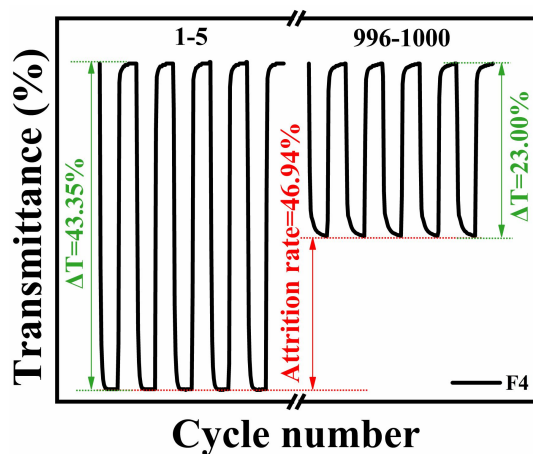

Figure.S7 The stability chart of F4 film at 650 nm.
